# Supplementary material for: Interfacial structuring of non-halogenated imidazolium ionic liquids at charged surfaces: effect of alkyl chain length
Source: Royal Society of Chemistry journal article supplement (doi:10.1039/d0cp00360c), 2020-01-01
Supplement: d0cp00360c1.pdf [file d0cp00360c1.pdf]

## Supplementary Information

### Interfacial Structure of Non-halogenated Ionic Liquids at Charged Surfaces: Effect of Alkyl Chain Length

Seiya Watanabe<sup>a,‡</sup> and Georgia A. Pilkington<sup>a</sup>, Anna Oleshkevych<sup>a</sup>, Patricia Pedraz<sup>a</sup>, Milad Radiom<sup>a</sup>,  
Rebecca Welbourn<sup>b</sup>, Sergei Glavatskih<sup>c,d</sup>, Mark W. Rutland<sup>a,e,\*</sup>

<sup>a</sup> Division of Surface and Corrosion Science, School of Engineering Sciences in Chemistry, Biotechnology and Health, KTH Royal Institute of Technology, SE-100 44 Stockholm, Sweden. <sup>b</sup> ISIS Facility, Rutherford Appleton Laboratory, STFC, Chilton, Didcot, OXON OX11 0QX, UK. <sup>c</sup> System and Component Design, Department of Machine Design, KTH Royal Institute of Technology, SE-100 44 Stockholm, Sweden. <sup>d</sup> Department of Electrical Energy, Metals, Mechanical Constructions and Systems, Ghent University, B-9052 Ghent, Belgium. <sup>e</sup> Surfaces, Processes and Formulation, RISE Research Institutes of Sweden, SE-100 44 Stockholm, Sweden. <sup>f</sup> Laboratoire de Tribologie Dynamique des Systèmes, 36 Avenue Guy de Collongue, Ecole Centrale de Lyon, 69134 Écully, France.

‡ Current address: Tokyo University of Science, Department of Mechanical Engineering, 6-3-1 Nijjuku, Katsushika-ku, Tokyo 125-8585, Japan

\* Correspondence: mark@kth.se

#### Cyclic voltammetry of [C<sub>10</sub>C<sub>1</sub>Im][BOB]

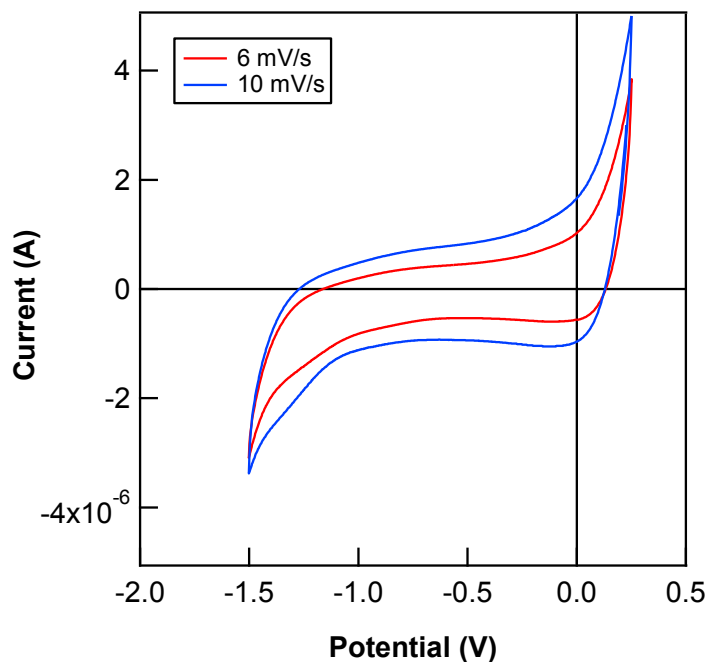

**Figure S1.** Representative cyclic voltammograms (CV) measured for the ionic liquid [C<sub>10</sub>C<sub>1</sub>Im][BOB] after neutron reflectivity (NR) measurements at a scan rate of 6 and 10 mV/s. Both curves were stable over multiple scans and show no evidence of Faradaic events within the potential window studied.

### Theoretical calculation results: Relationship between orientation angles and SFG intensity

The molecular orientation angle is defined as follows. A tilt angle  $\theta$  of  $0^\circ$  is defined as the surface normal and that of  $90^\circ$  as parallel to the surface plane. A twist angle  $\phi$  of  $0^\circ$  is defined as parallel to the surface and that of  $90^\circ$  as perpendicular to the surface.

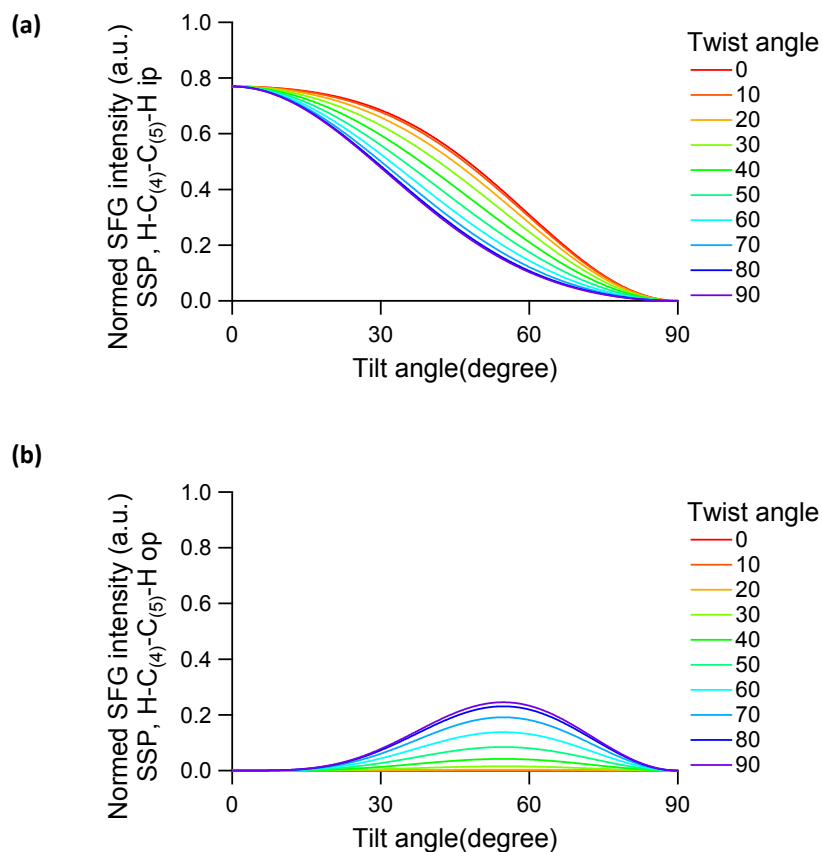

**Figure S2.** Relationship between orientation angles and SFG intensity of **(a)** H-C<sub>(4)</sub>-C<sub>(5)</sub>-H-ip and **(b)** H-C<sub>(4)</sub>-C<sub>(5)</sub>-H-op for SSP.

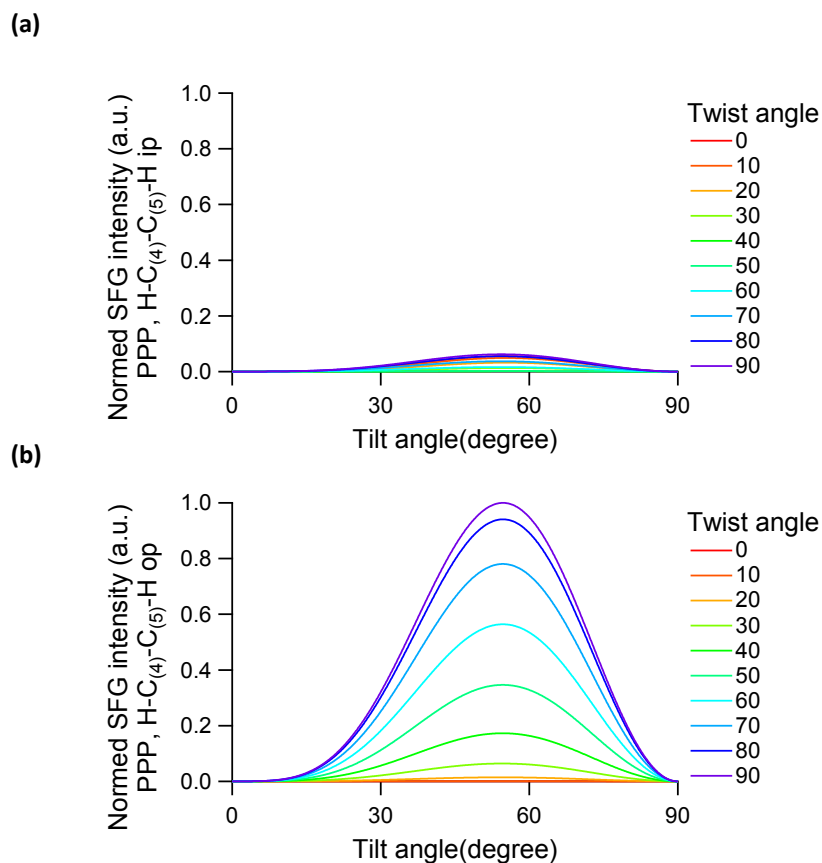

**Figure S3.** Relationship between orientation angles and SFG intensity of **(a)** H-C<sub>(4)</sub>-C<sub>(5)</sub>-H-ip and **(b)** H-C<sub>(4)</sub>-C<sub>(5)</sub>-H-op for PPP.

#### IR spectra of ILs

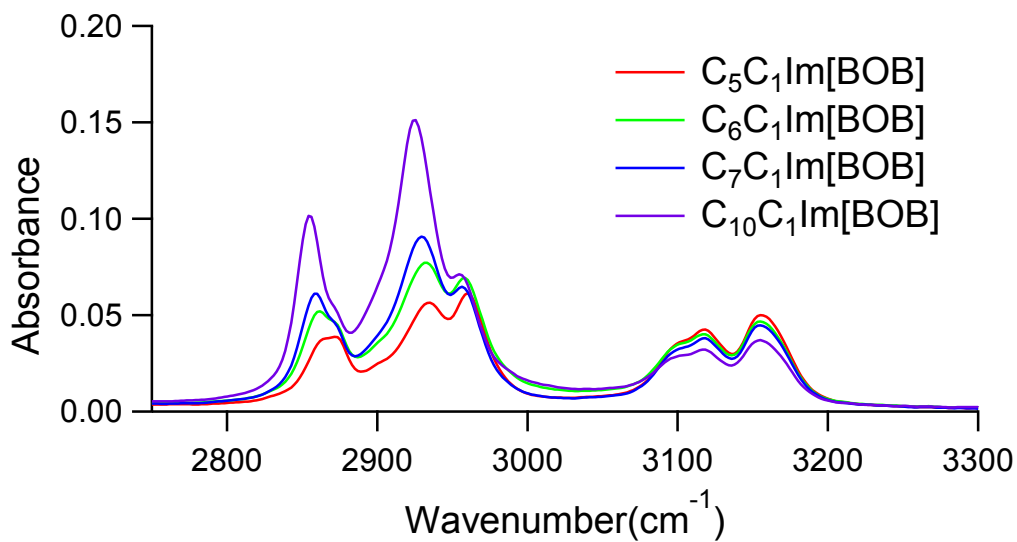

**Figure S4.** IR spectra of [C<sub>5</sub>C<sub>1</sub>Im][BOB], [C<sub>6</sub>C<sub>1</sub>Im][BOB], [C<sub>7</sub>C<sub>1</sub>Im][BOB] and [C<sub>10</sub>C<sub>1</sub>Im][BOB] over the wavenumber range of 2750 – 3300 cm<sup>-1</sup>.

### Current decays measured for [C<sub>10</sub>C<sub>1</sub>Im][BOB] after potential changes in neutron reflectivity experiments

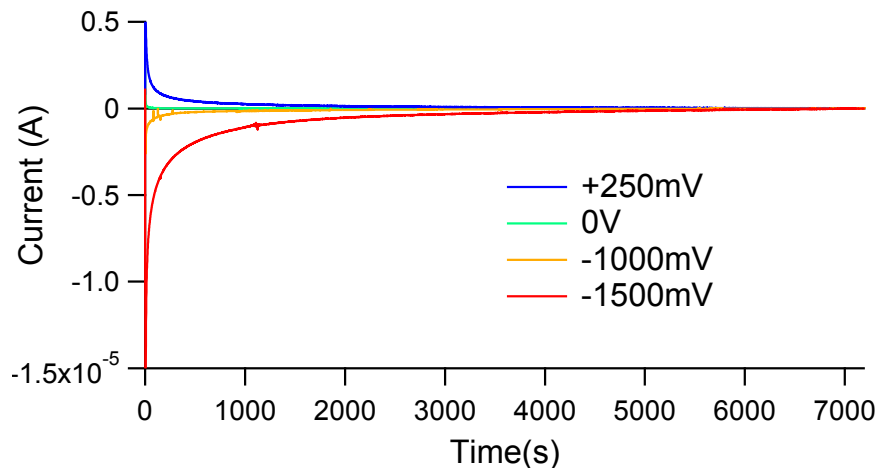

**Figure S5.** Current as a function of time after application of different applied potentials during NR measurements of [C<sub>10</sub>C<sub>1</sub>Im][BOB] at a gold electrode interface. Corresponding surface charge densities calculated from the current-time profiles are listed in the main manuscript text.

### Neutron reflectivity of gold substrate in air

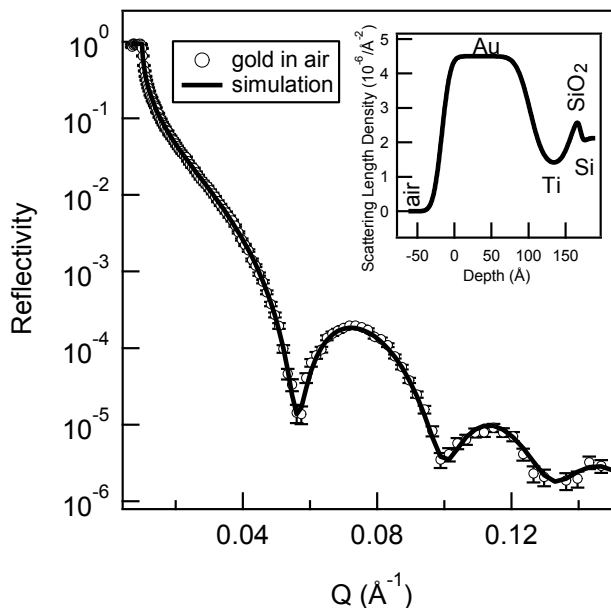

**Figure S6.** Neutron reflectivity of the gold electrode in air. The symbols represent experimental data, while the solid lines represent a fitted scattering length density (SLD) model fit to the data. The inset shows the corresponding SLD profile.

**Table S1.** Fitted parameters for the gold electrode in air corresponding to the model fit (solid line) presented in Figure S6.

| Layer            | Thickness (Å) | Roughness (Å) | SLD ( $\times 10^{-6} \text{Å}^{-2}$ ) |
|------------------|---------------|---------------|----------------------------------------|
| Au               | 119.0         | 9.1           | 4.50                                   |
| Ti               | 55.7          | 14.4          | 1.35                                   |
| SiO <sub>2</sub> | 12.2          | 11.3          | 3.06                                   |
| Si               | Inf           | 3.0           | 2.13                                   |

#### NR SLD model fit parameters

**Table S2.** Neutron reflectivity fitted parameters for IL on gold electrode at a potential of 0 V.

| Layer | Thickness (Å) | Roughness (Å) | SLD ( $10^{-6} \text{Å}^{-2}$ ) |
|-------|---------------|---------------|---------------------------------|
| 1     | 7.5           | 5.3           | -0.62                           |
| 2     | 4.2           | 0.6           | 1.92                            |
| 3     | 6.3           | 1.5           | 2.94                            |
| 4     | 11.2          | 1.9           | 1.14                            |
| Bulk  | Inf           | 1.0           | 1.55                            |

**Table S3.** Neutron reflectivity fitted parameters for IL on gold electrode at a potential of -1 V.

| Layer | Thickness (Å) | Roughness (Å) | SLD ( $10^{-6} \text{Å}^{-2}$ ) |
|-------|---------------|---------------|---------------------------------|
| 1     | 2.5           | 2.5           | 1.00                            |
| 2     | 7.0           | 7.0           | -0.62                           |
| 3     | 2.0           | 1.0           | 1.91                            |
| 4     | 11.7          | 1.8           | 3.02                            |
| 5     | 9.6           | 1.1           | 0.39                            |
| 6     | 12.3          | 1.5           | 1.95                            |
| Bulk  | Inf           | 5.7           | 1.55                            |

**Table S4.** Neutron reflectivity fitted parameters for IL on gold electrode at a potential of +0.25 V.

| Layer | Thickness (Å) | Roughness (Å) | SLD ( $10^{-6} \text{Å}^{-2}$ ) |
|-------|---------------|---------------|---------------------------------|
| 1     | 6.2           | 6.2           | 0.50                            |
| 2     | 5.1           | 5.0           | -0.61                           |
| 3     | 2.0           | 0.3           | 1.90                            |
| 4     | 6.1           | 1.9           | 2.91                            |
| 5     | 4.0           | 1.3           | 1.97                            |
| 6     | 8.2           | 1.6           | 0.55                            |
| 7     | 14.0          | 10.9          | 2.22                            |
| Bulk  | Inf           | 12.7          | 1.55                            |

**Table S5.** Neutron reflectivity fitted parameters for IL on gold electrode at a potential of -1.5 V.

| Layer | Thickness (Å) | Roughness (Å) | SLD ( $10^{-6}\text{Å}^{-2}$ ) |
|-------|---------------|---------------|--------------------------------|
| 1     | 2.5           | 2.5           | 1.73                           |
| 2     | 8.2           | 7.0           | -0.62                          |
| 3     | 4.4           | 1.0           | 2.60                           |
| 4     | 7.0           | 1.6           | 3.02                           |
| 5     | 3.0           | 1.0           | 1.84                           |
| 6     | 9.1           | 1.0           | 0.81                           |
| 7     | 13.0          | 1.8           | 2.06                           |
| Bulk  | Inf           | 14.2          | 1.55                           |

**Interfacial model schematic for 0 V**

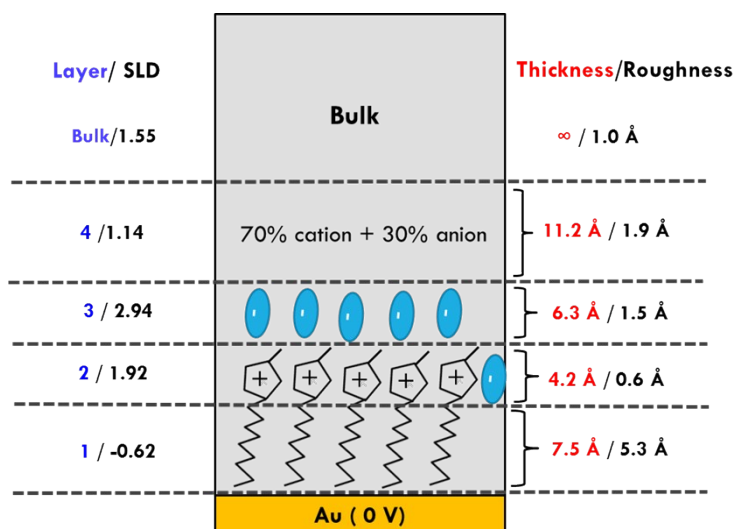

**Figure S7.** Schematic illustration of the interfacial structures of the ionic liquid  $[\text{C}_{10}\text{C}_1\text{Im}][\text{BOB}]$  at 0 V obtained from SLD model fits to the reflectivity curve at this potential.

### Neutron reflectivity measurement: Kinetic results and analysis

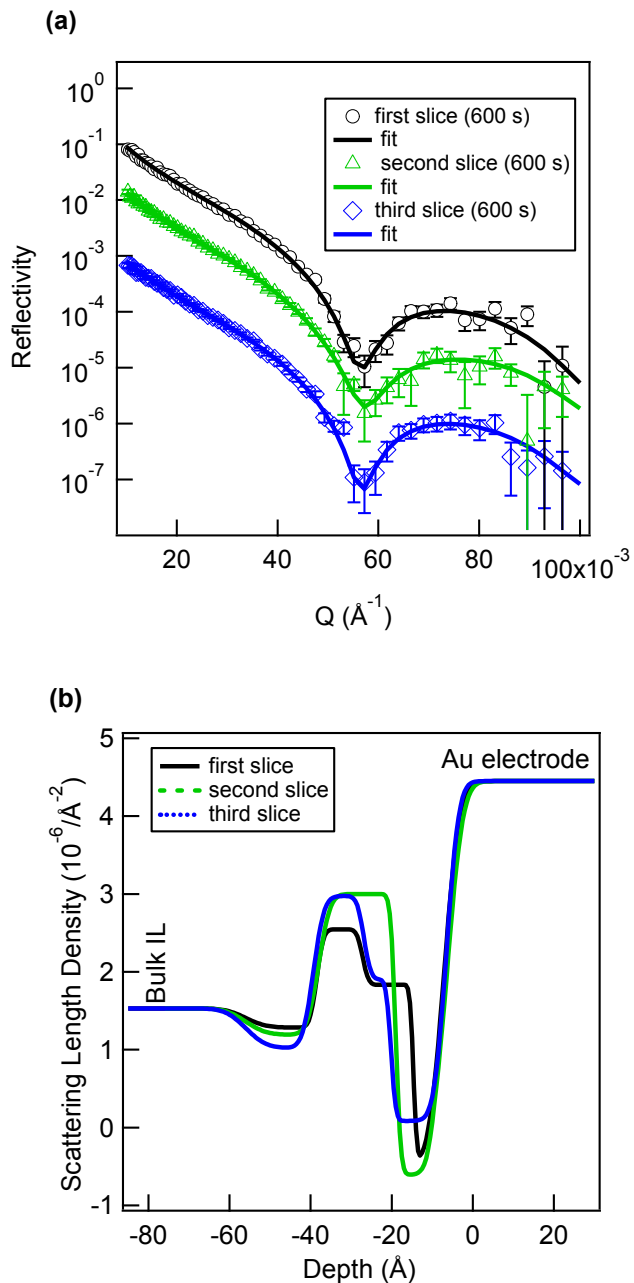

**Figure S8.** (a) Neutron reflectivity curves measured during 600 s intervals for  $[\text{C}_{10}\text{C}_1\text{Im}][\text{BOB}]$  at a gold electrode during equilibration at an applied potential of -1 V. The symbols represent experimental data, while the solid lines represent fitted scattering length density (SLD) model fits to the data. (b) shows the corresponding SLD profiles.

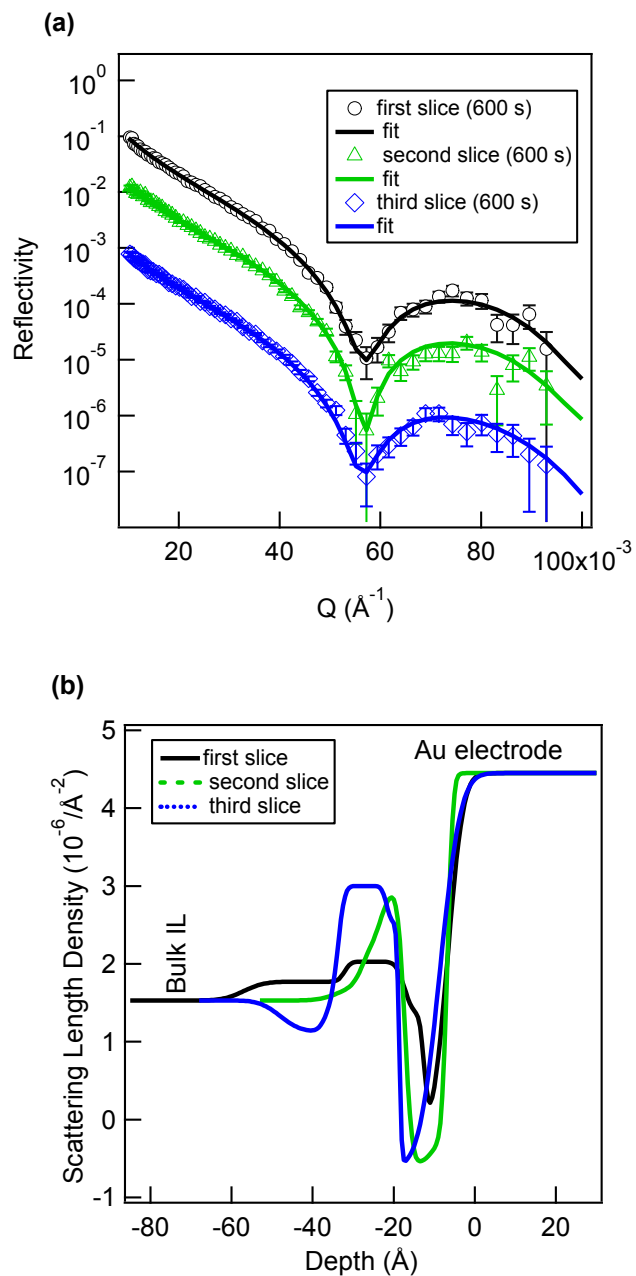

**Figure S9. (a)** Neutron reflectivity curves measured during 600 s intervals for  $[\text{C}_{10}\text{C}_1\text{Im}][\text{BOB}]$  at a gold electrode during equilibration at an applied potential of +0.25 V. The symbols represent experimental data, while the solid lines represent fitted scattering length density (SLD) model fits to the data. **(b)** shows the corresponding SLD profiles.



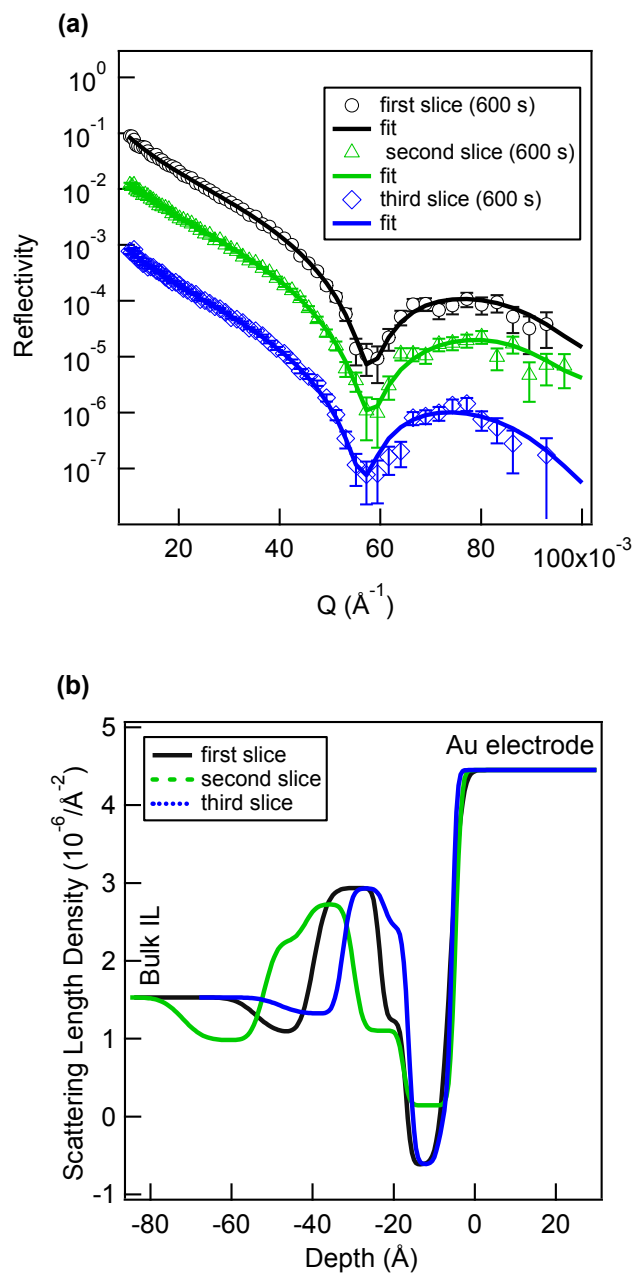

**Figure S10. (a)** Neutron reflectivity curves measured during 600 s intervals for  $[\text{C}_{10}\text{C}_1\text{Im}][\text{BOB}]$  at a gold electrode during equilibration at an applied potential of -1.5 V. The symbols represent experimental data, while the solid lines represent fitted scattering length density (SLD) model fits to the data. **(b)** shows the corresponding SLD profiles.

### SFG peak intensity ratios in alkyl chain region

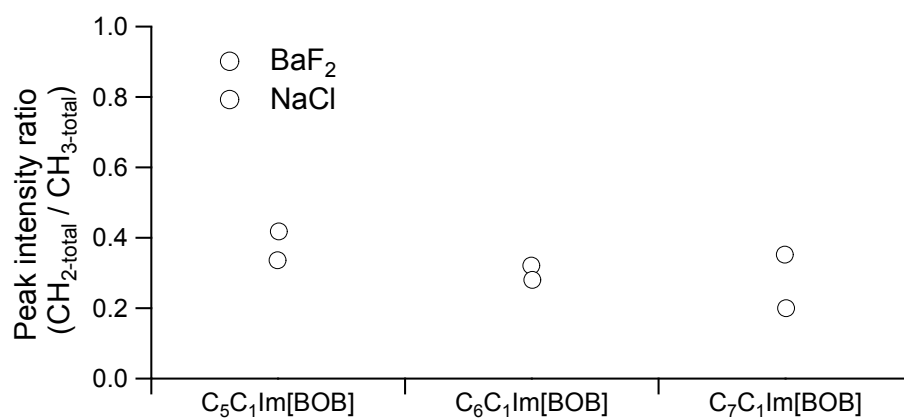

**Figure S11.** Peak intensity ratio of CH<sub>2-total</sub>/CH<sub>3-total</sub> obtained from SFG spectra. C<sub>5</sub> - C<sub>7</sub> at NaCl surface showed decrease in the peak intensity ratio of CH<sub>2-total</sub>/CH<sub>3-total</sub> with increase of chain length, while at the BaF<sub>2</sub> showed constant of the ratio against chain length. This indicates cation with longer alkyl chain adopts a form with less gauche defects in the alkyl chain and therefore can pack more efficiently. Conversely, C<sub>10</sub> does not show any strong aliphatic C-H peaks (data not included as signal was too weak). This is believed to be due to this IL forming a bilayer structure resulting in a cancelling out effect of the alkyl peaks.
